# Supplementary material for: Peripheral functionalisation of a stable phthalocyanine J-type dimer to control the aggregation behaviour and NLO properties: UV-Vis, fluorescence, DFT, TDHF and thermal study
Source: Royal Society of Chemistry journal article supplement (doi:10.1039/c4ra15239e), 2014-12-23
Supplement: c4ra15239e1.pdf [file c4ra15239e1.pdf]

*Electronic Supplementary Material (ESI) for RSC Advances Journal.*

**Peripheral functionalisation of a stable phthalocyanine J-type dimer to control the aggregation behaviour and NLO properties: UV–Vis, fluorescence, DFT, TDHF and thermal study**

Alexander Yu. Tolbin,<sup>\*a</sup> Alexander V. Dzuban,<sup>b</sup> Vladimir I. Shestov,<sup>a</sup>  
Yuliana I. Gudkova,<sup>a</sup> Valery K. Brel,<sup>a,c</sup> Larisa G. Tomilova,<sup>a,b</sup> and Nikolay S. Zefirov<sup>a,b</sup>

<sup>a</sup> Institute of Physiologically Active Compounds, Russian Academy of Sciences, 142432 Chernogolovka, Moscow Region (Russian Federation)

<sup>b</sup> Department of Chemistry M. V. Lomonosov Moscow State University, 119991 Moscow (Russian Federation)

<sup>c</sup> A.N.Nesmeyanov Institute of Organoelement Compounds, Russian Academy of Sciences, 119991, GSP-1, Moscow, V-334, Vavilova St. 28, INEOS (Russian Federation)

\* Corresponding author. Tel.: +7 496 5242566, e-mail address: tolbin@ipac.ac.ru (Dr. A.Yu. Tolbin).

**Table of Contents**

|                                              |    |
|----------------------------------------------|----|
| 1. MALDI–TOF/TOF mass spectra.....           | 2  |
| 2. NMR spectra.....                          | 3  |
| 3. Infrared spectra.....                     | 5  |
| 4. Fluorescence study .....                  | 5  |
| 5. DFT calculations .....                    | 7  |
| 5. TDHF calculations.....                    | 8  |
| 6. References .....                          | 9  |
| APPENDIX A. Cartesian matrices.....          | 10 |
| APPENDIX B. Analytic gradient matrices ..... | 15 |

# 1. MALDI-TOF/TOF mass spectra

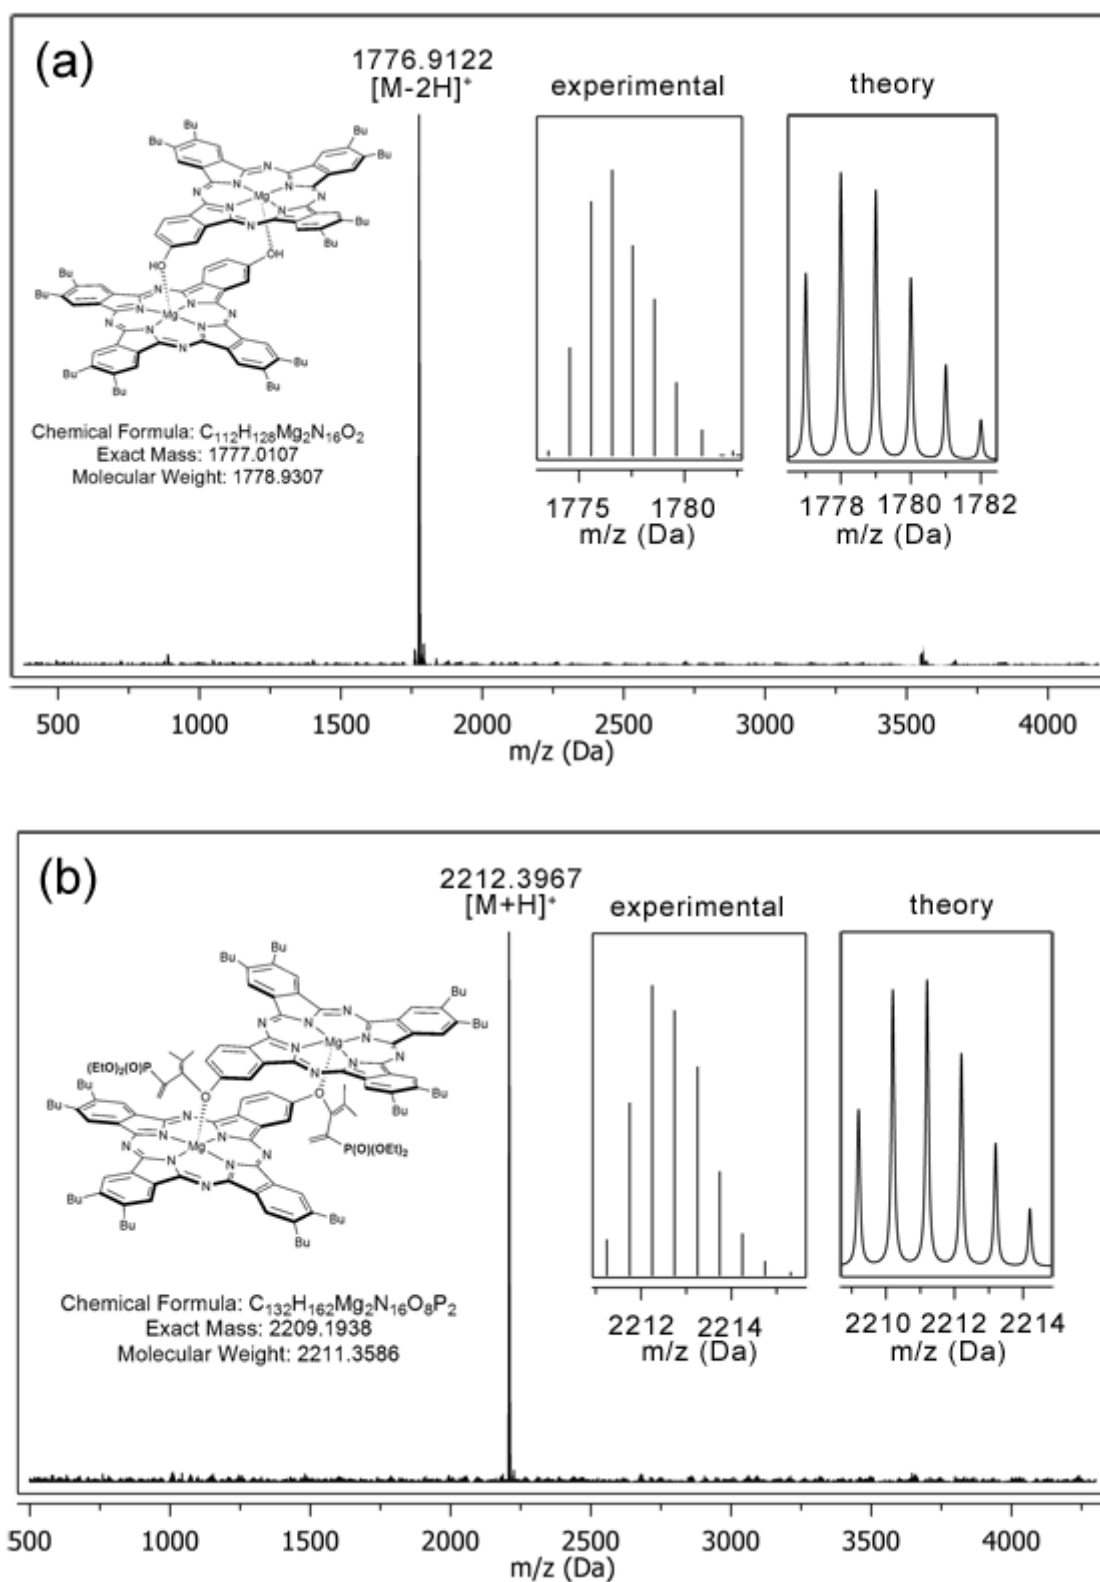

**Fig. S1.** MALDI-TOF/TOF mass spectra of **2** (a, no matrix) and **4** (b, matrix – DHB).

## 2. NMR spectra

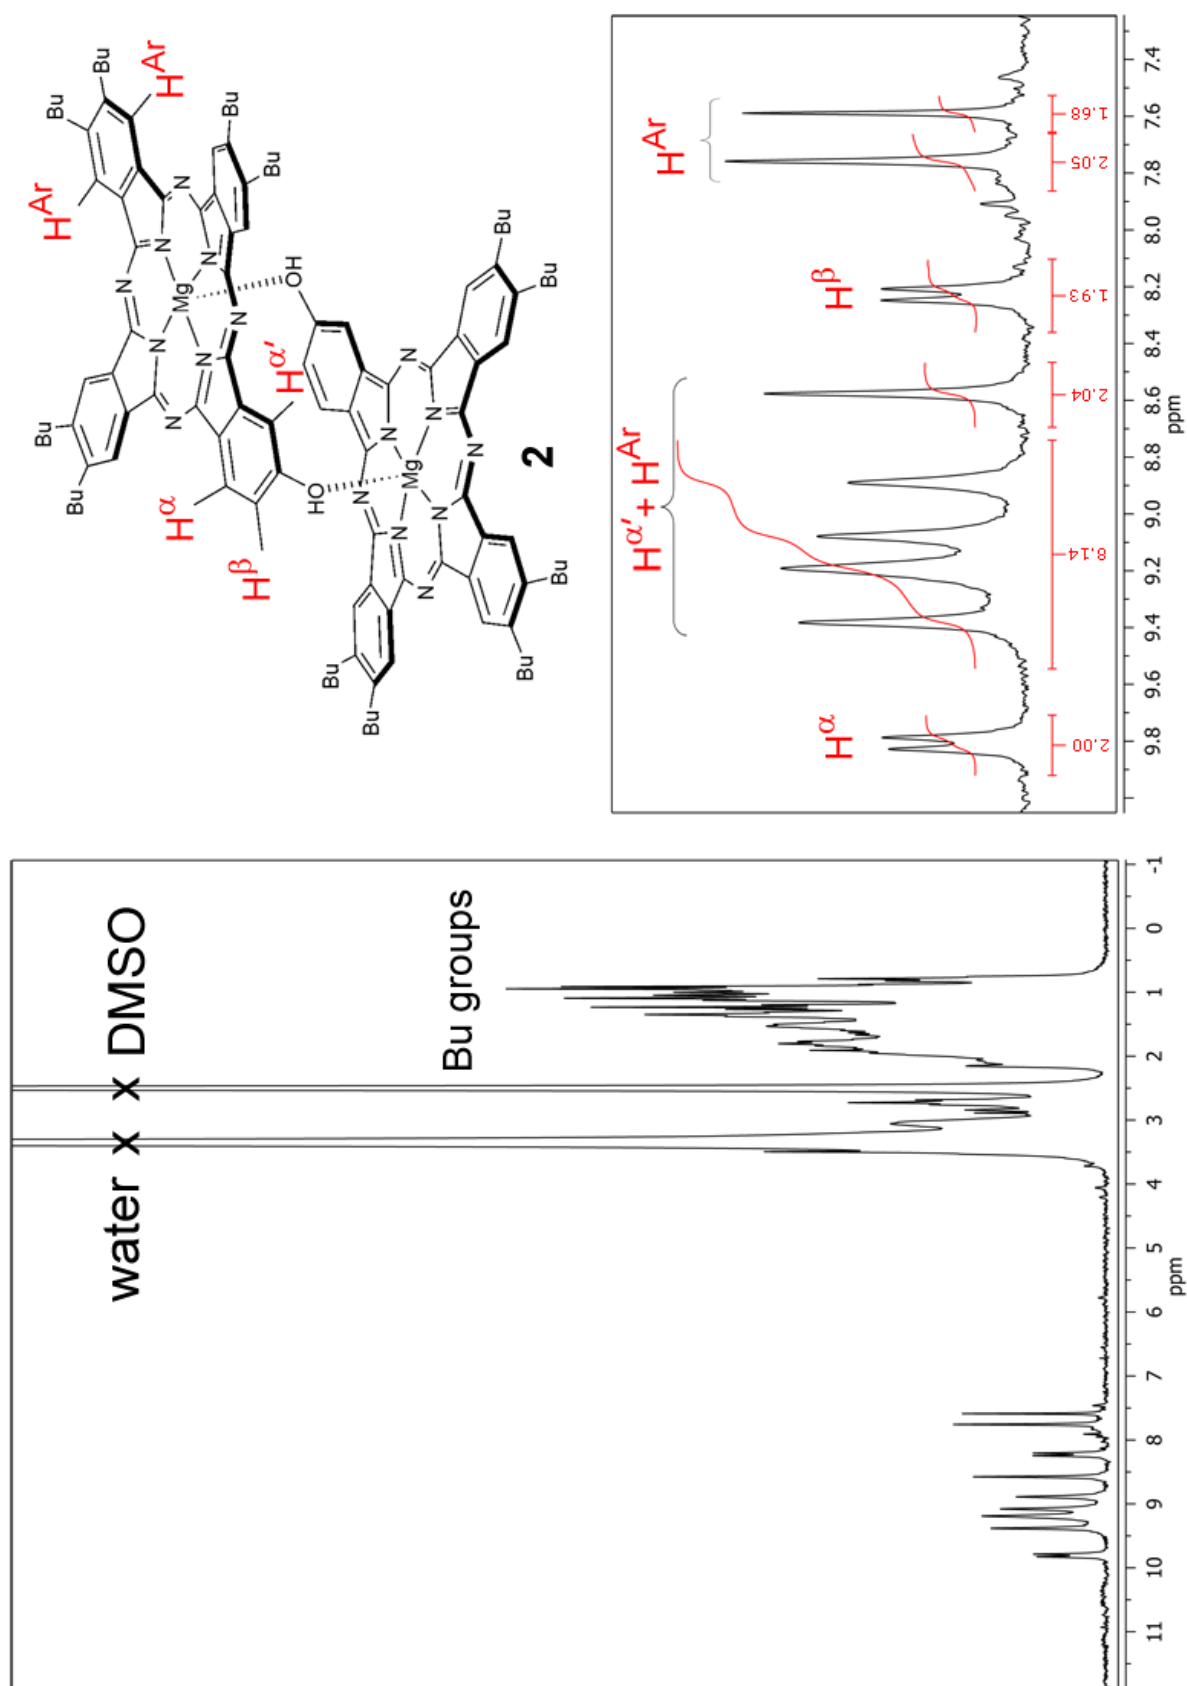

Fig S2.  $^1\text{H}$  NMR spectrum ( $\text{DMSO-d}_6$ ) of **2**.

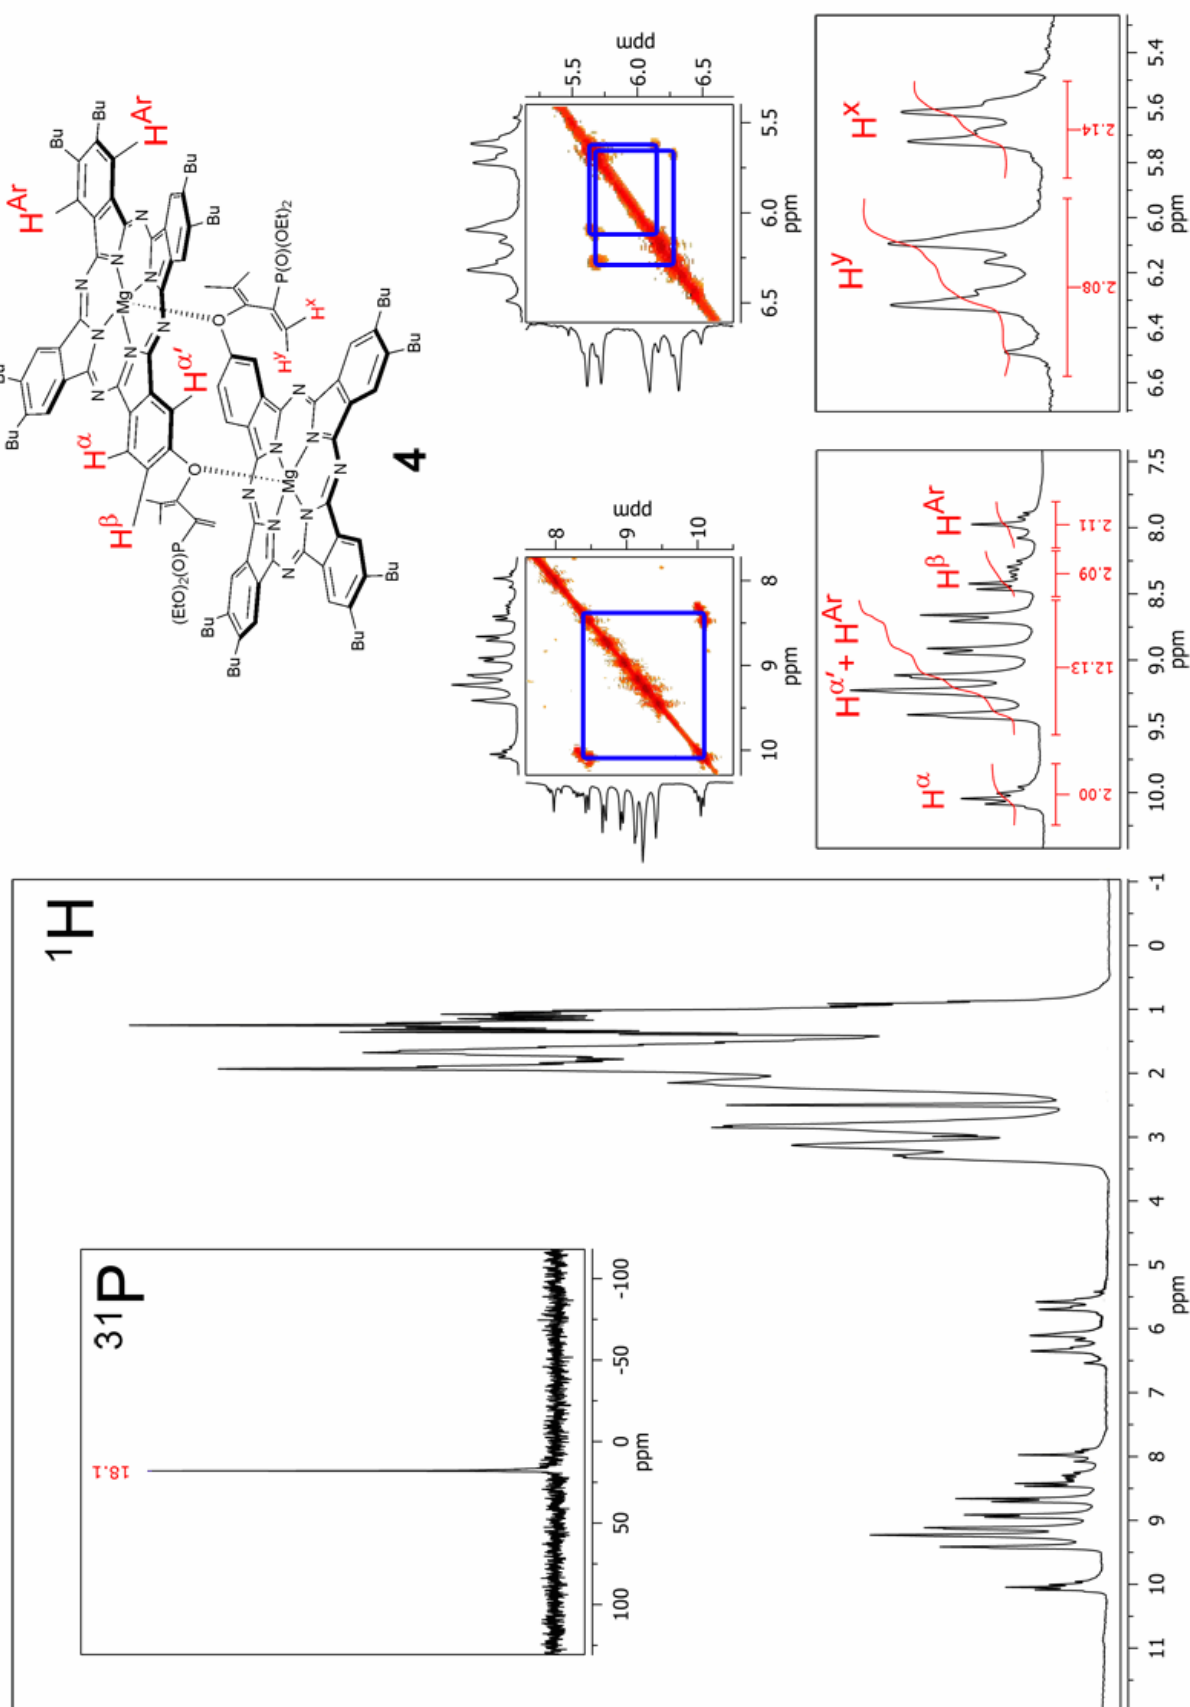

**Fig. S3.**  $^{31}\text{P}$ ,  $^1\text{H}$  and  $^1\text{H}$ - $^1\text{H}$  COSY NMR spectra ( $\text{CCl}_4 + 5\% \text{DMSO-d}_6$ ) of **4**.

### 3. Infrared spectra

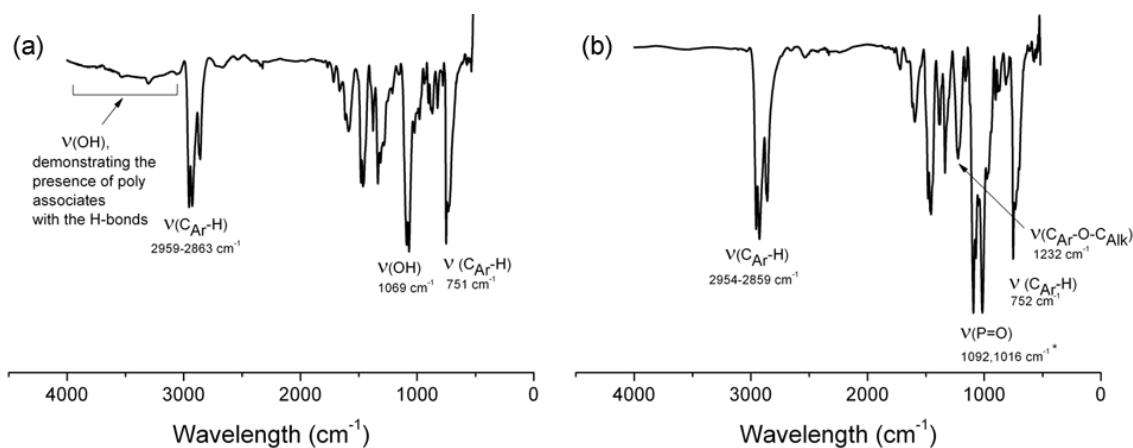

**Fig. S4.** FT-IR spectra of complexes **2** (a) and **4** (b) in  $\text{CCl}_4$ .

### 4. Fluorescence study

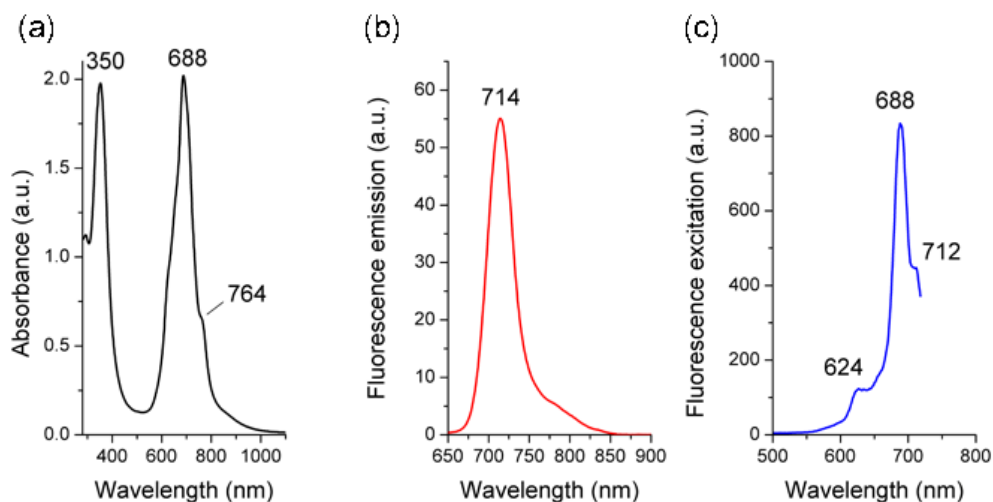

**Fig. S5.** UV-Vis (a,  $C=9.6 \times 10^{-5} \text{ mol dm}^{-3}$ ), fluorescence emission (b,  $\lambda_{\text{exc}}=600 \text{ nm}$ ) and excitation (c,  $\lambda_{\text{em}}=730 \text{ nm}$ ) spectra ( $C=4.8 \times 10^{-6} \text{ mol dm}^{-3}$ ) of **2** in toluene.

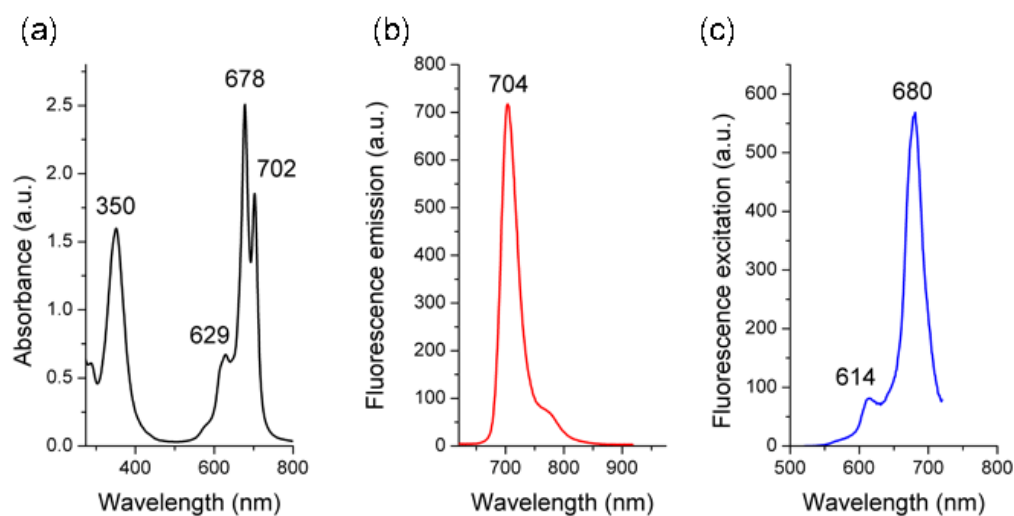

**Fig. S6.** UV-Vis (a,  $C=6.1 \times 10^{-5} \text{ mol dm}^{-3}$ ), fluorescence emission (b,  $\lambda_{\text{exc}}=600 \text{ nm}$ ) and excitation (c,  $\lambda_{\text{em}}=730 \text{ nm}$ ) spectra ( $C=4.8 \times 10^{-6} \text{ mol dm}^{-3}$ ) of **2** in THF.

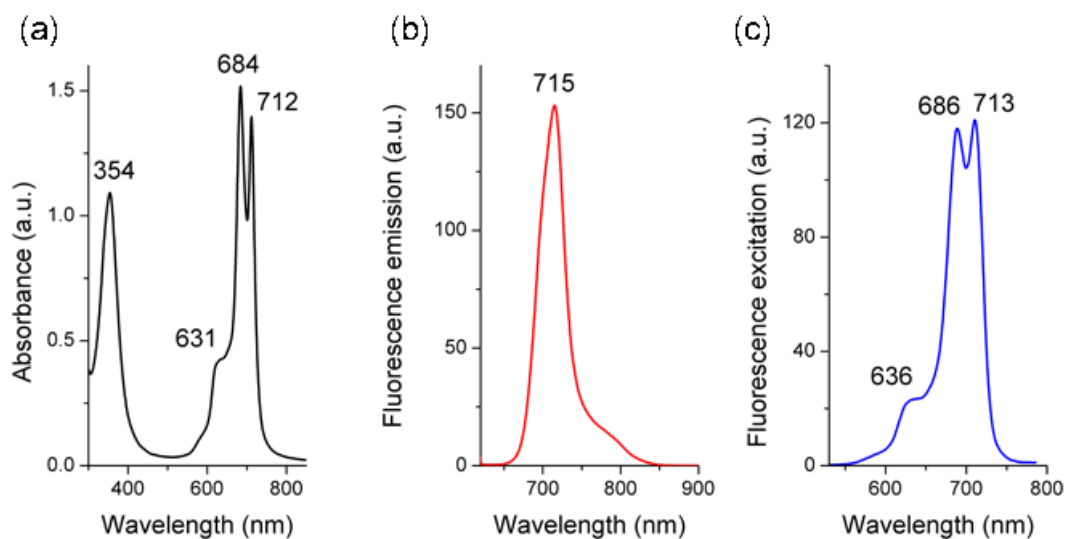

**Fig. S7.** UV-Vis (a,  $C=4.1 \times 10^{-5} \text{ mol dm}^{-3}$ ), fluorescence emission (b,  $\lambda_{\text{exc}}=600 \text{ nm}$ ) and excitation (c,  $\lambda_{\text{em}}=800 \text{ nm}$ ) spectra ( $C=2.8 \times 10^{-6} \text{ mol dm}^{-3}$ ) of **4** in toluene.

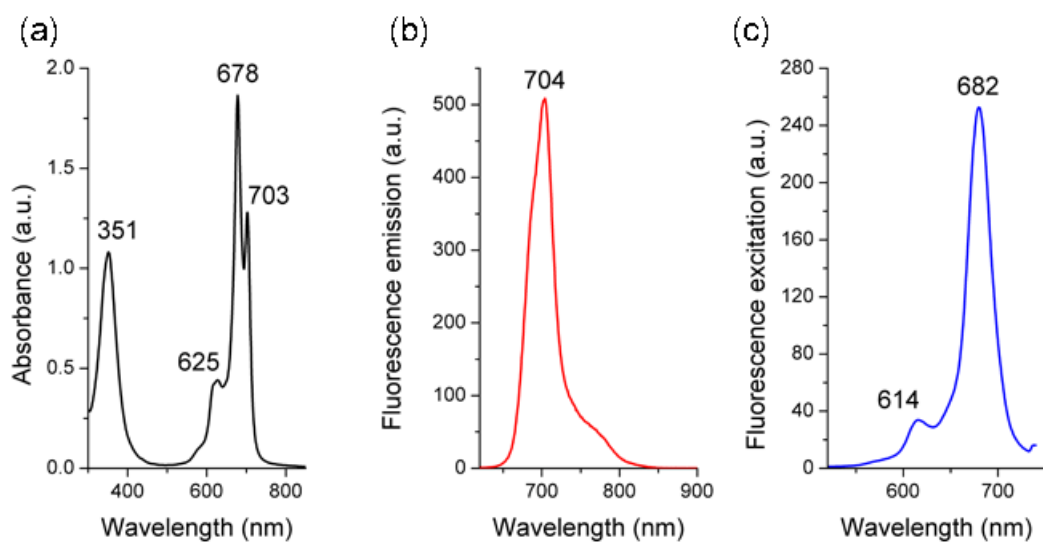

**Fig. S8.** UV-Vis (a,  $C=4.6 \times 10^{-5} \text{ mol dm}^{-3}$ ), fluorescence emission (b,  $\lambda_{\text{exc}}=600 \text{ nm}$ ) and excitation (c,  $\lambda_{\text{em}}=730 \text{ nm}$ ) spectra ( $C=2.3 \times 10^{-6} \text{ mol dm}^{-3}$ ) of **4** in THF.

## 5. DFT calculations

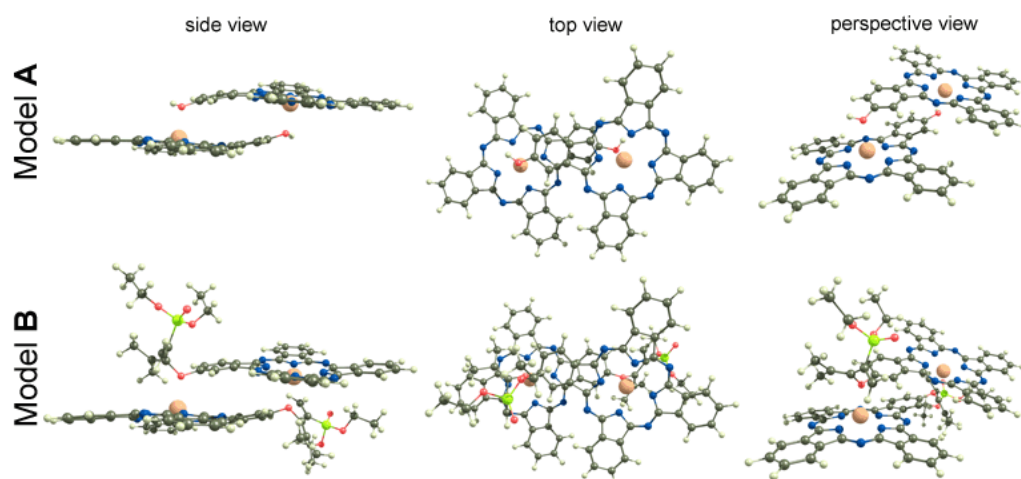

**Fig S9.** DFT-optimized structures for models based on compounds **2** and **4** with butyl groups replaced by hydrogen atoms for clarity.

**Table S1.** Appropriate computed data for models based on dimeric complexes **2** and **4**.

| Property                                                                                             | Model          |                |
|------------------------------------------------------------------------------------------------------|----------------|----------------|
|                                                                                                      | A              | B              |
| Total Energy, a.u.                                                                                   | −3884.0197     | −5801.6064     |
| Symmetry point group                                                                                 | C <sub>2</sub> | C <sub>2</sub> |
| The distance between Mg and O atoms, Å                                                               | 2.25           | 2.25           |
| The displacement of Mg outside the 4N <sub>iso</sub> plane, Å                                        | 0.42           | 0.62           |
| The distance between the centroid of one macrocycle and 4N <sub>iso</sub> plane of the second one, Å | 3.82           | 3.64           |
| The distance between the macrocycles in the effective contact area, Å                                | 2.59           | 2.77           |
| The angle between the 4N <sub>iso</sub> planes of the macrocycles, deg.                              | 16.7           | 23.8           |
| The distortion of isoindoline fragment in the effective contact area, deg.                           | 15.67          | 9.84           |
| The rotation angle of the macrocycles, deg.                                                          | 30.5           | 35.8           |

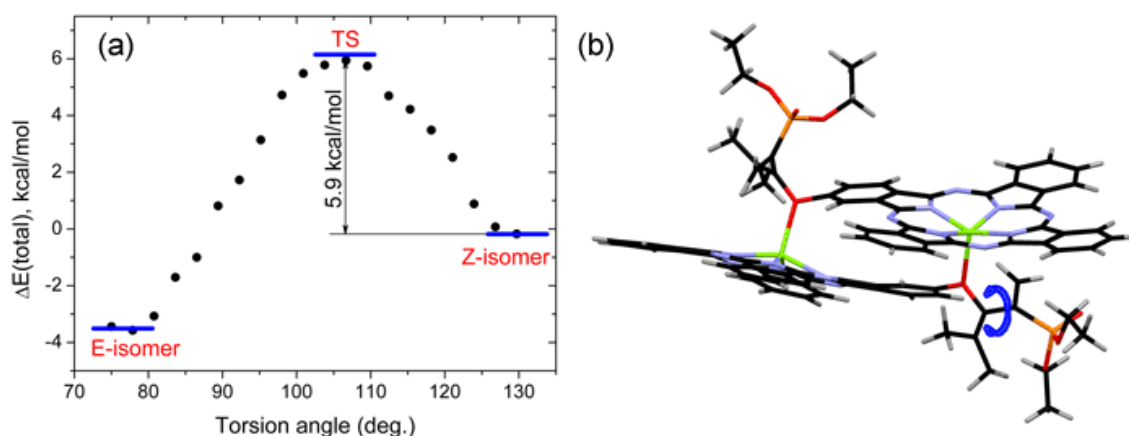

**Fig S10.** Scanning the PES of rotation of double bonds within the diene fragments on the periphery (a). For clarity, the single rotation is shown (b). The torsion angles  $\text{Me}_2\text{C}=\text{C}(\text{OPc}_2)-\text{C}(\text{P}(\text{O})(\text{OEt})_2)=\text{CH}_2$  were changing from 75° to 130° with a step of 3°.

In this work, DFT calculations were provided with quantum-chemical program PRIRODA <sup>1</sup>. PBE functional <sup>2</sup> and cc-pVDZ basis set <sup>3</sup> were used for optimization of the structure geometries corresponded to steady state as well as for scanning of the potential energy surface (PES). Butyl substituents were replaced with hydrogen atoms for reducing a calculation time. The size of the basis set used is {6s2p}/[2s1p] for H; {10s7p3d}/[3s2p1d] for C,N,O; {14s11p6d}/[5s4p2d] for Mg and {14s11p3d}/[4s3p1d] for P atoms respectively. The geometry coordinates and analytic gradients of optimized structures for the models based on dimeric complexes **2** and **4** are represented in Appendixes A and B.

## 5. TDHF calculations

Time-dependent Hartree Fock (TDHF) calculations were performed on the models of compounds **2** and **4** with GAMESS US package <sup>4</sup>. We suggest that butyl groups do not influence on comparison of NLO properties of the dimeric complexes, therefore they were replaced with hydrogen atoms to reduce a calculation time. The structures of Models **A** and **B** were initially optimized on HF/6-311++G\*\* level of theory in order to obtain the most truthful results. In this work, static polarizabilities and zero-frequency first hyperpolarizabilities were calculated for prediction of NLO properties of dimers **2** and **4** and for making their comparison. The Tables below summarize data about the polarizability ( $\alpha$ ) and the first hyperpolarizability ( $\beta$ ) tensor components.

**Table S2.** The static polarizability ( $\alpha$ ) tensor components (a.u.).

| Model    | $\alpha_{xx}$ | $\alpha_{yy}$ | $\alpha_{zz}$ | $\alpha$ |
|----------|---------------|---------------|---------------|----------|
| <b>A</b> | 1596.8956     | 2007.9736     | 275.5811      | 860.1020 |
| <b>B</b> | 1716.9442     | 2285.7806     | 550.9043      | 970.4630 |

**Table S3.** The zero-frequency first hyperpolarizability ( $\beta$ ) tensor components (a.u.).

| Parameter     | Model <b>A</b> | Model <b>B</b> |
|---------------|----------------|----------------|
| $\beta_{xxx}$ | -1862.1508     | 2414.1149      |
| $\beta_{xyy}$ | -2510.1019     | 1681.2556      |
| $\beta_{xzz}$ | -130.0636      | 386.7217       |
| $\beta_{yyy}$ | 351.2593       | 4369.3951      |
| $\beta_{yzz}$ | 697.0069       | 455.4402       |
| $\beta_{yxx}$ | -368.4831      | 536.9856       |
| $\beta_{zzz}$ | -31.1741       | 80.3877        |
| $\beta_{zxx}$ | -508.5411      | 577.2290       |
| $\beta_{zyy}$ | -140.3314      | 317.9062       |
| $\beta$       | 4603.8484      | 7056.1972      |

## 6. References

1. D. N. Laikov, Yu. A. Ustynyuk, *Russ. Chem. Bull., Int. Ed.*, 2005, **54**, 820-826.
2. M. Ernzerhof, G.E. Scuseria, *J. Chem. Phys.*, 1999, **110**, 5029.
3. D.N. Laikov, *Chem. Phys. Lett.*, 2005, **416**, 116-120.
4. M.W. Schmidt, K.K. Baldridge, J.A. Boatz, S.T. Elbert, M.S. Gordon, J.H. Jensen, S. Koseki, N. Matsunaga, K.A. Nguyen, S. Su, T.L. Windus, M. Dupuis, J.A. Montgomery, *J. Comput. Chem.*, 1993, **14**, 1347–1363.

**Table S4.** Cartesian matrix for the model based on dimer **2** (optimized structure).

| Atom No | x           | y           | z          |
|---------|-------------|-------------|------------|
| 6       | 5.94337417  | 2.16503135  | 1.94089382 |
| 6       | 6.23925115  | 3.51701076  | 1.68656389 |
| 6       | 5.22801274  | 4.43446401  | 1.39387399 |
| 6       | 3.91427207  | 3.96761894  | 1.35725771 |
| 6       | 3.61728009  | 2.60937524  | 1.61563177 |
| 6       | 4.62850612  | 1.69539736  | 1.91185232 |
| 6       | 2.63575591  | 4.63207358  | 1.09145539 |
| 7       | 1.63308996  | 3.69791509  | 1.17670855 |
| 6       | 2.16341467  | 2.47369182  | 1.50578706 |
| 6       | -1.01823945 | -2.37975045 | 1.54525973 |
| 6       | -0.05952018 | -1.37865782 | 1.66912568 |
| 6       | -0.52475244 | -0.06735787 | 1.74070794 |
| 6       | -1.90672991 | 0.22825911  | 1.72635118 |
| 6       | -2.85173142 | -0.79717293 | 1.68565718 |
| 6       | -2.39752238 | -2.11164383 | 1.58406803 |
| 6       | 0.17960977  | 1.21489674  | 1.67715501 |
| 7       | -0.75448285 | 2.21610123  | 1.57458297 |
| 6       | -2.01975736 | 1.68375956  | 1.62697965 |
| 6       | -4.56952116 | 4.37040099  | 1.40686627 |
| 6       | -4.27102557 | 5.72896913  | 1.15037752 |
| 6       | -5.27756644 | 6.69493913  | 1.13561505 |
| 6       | -6.58786426 | 6.27705686  | 1.37489104 |
| 6       | -6.88505089 | 4.92521443  | 1.63004199 |
| 6       | -5.87932713 | 3.95736791  | 1.65290640 |
| 6       | -3.29698470 | 3.64751254  | 1.36104180 |
| 7       | -2.29576703 | 4.54453684  | 1.06939700 |
| 6       | -2.82222052 | 5.80792153  | 0.95165794 |
| 6       | 2.20381117  | 9.03834916  | 0.43575903 |
| 6       | 1.75351472  | 10.35220491 | 0.29353410 |
| 6       | 0.37864217  | 10.65007657 | 0.25942872 |
| 6       | -0.58096567 | 9.64162468  | 0.36646083 |
| 6       | -0.13388959 | 8.32700473  | 0.49899751 |
| 6       | 1.24743126  | 8.02782297  | 0.53352924 |
| 6       | -0.84045043 | 7.05243778  | 0.64563267 |
| 7       | 0.08998763  | 6.04445052  | 0.73157741 |
| 6       | 1.35721398  | 6.57674898  | 0.70046077 |
| 7       | 2.51882711  | 5.93813236  | 0.84575141 |
| 7       | -2.16833567 | 6.94935467  | 0.72456438 |
| 7       | 1.50773547  | 1.32695930  | 1.68648516 |
| 7       | -3.18267716 | 2.33466852  | 1.56584768 |
| 12      | -0.33253093 | 4.05379987  | 0.78746174 |
| 8       | -0.54868982 | -3.67793983 | 1.27588619 |
| 1       | 6.75807452  | 1.47249798  | 2.16741835 |
| 1       | 7.27917246  | 3.85170352  | 1.72089846 |
| 1       | 5.44629760  | 5.48657769  | 1.19780531 |
| 1       | 4.38970190  | 0.64792020  | 2.10834221 |
| 1       | 1.00854997  | -1.60626328 | 1.64248877 |
| 1       | -3.91970181 | -0.56943773 | 1.67735186 |
| 1       | -3.11294576 | -2.93355801 | 1.47905531 |
| 1       | -5.03506783 | 7.74255304  | 0.94352152 |
| 1       | -7.39898041 | 7.00961946  | 1.36800694 |
| 1       | -7.92161370 | 4.63268688  | 1.81593335 |
| 1       | -6.09838406 | 2.90685355  | 1.85686597 |
| 1       | 3.26840003  | 8.79657005  | 0.47078582 |
| 1       | 2.47810118  | 11.16618372 | 0.20983006 |
| 1       | 0.06046676  | 11.69000986 | 0.15023636 |
| 1       | -1.65050071 | 9.86282572  | 0.34928868 |
| 1       | -1.25217789 | -4.32246509 | 1.49626340 |

|    |             |              |             |
|----|-------------|--------------|-------------|
| 6  | 6.40710358  | -1.61032841  | -0.36035769 |
| 6  | 6.74764763  | -2.93372369  | -0.02460835 |
| 6  | 5.78033761  | -3.94008335  | 0.01481207  |
| 6  | 4.46366633  | -3.59142592  | -0.28522189 |
| 6  | 4.12251433  | -2.26184040  | -0.62521805 |
| 6  | 5.09100678  | -1.25891404  | -0.66803061 |
| 6  | 3.22314685  | -4.36903376  | -0.34184006 |
| 7  | 2.19572586  | -3.52605815  | -0.68689096 |
| 6  | 2.68160435  | -2.25617885  | -0.88585370 |
| 6  | -0.80320111 | 2.29797666   | -1.77822834 |
| 6  | 0.24030015  | 1.38678069   | -1.64595012 |
| 6  | -0.07452000 | 0.04045723   | -1.81734193 |
| 6  | -1.38414770 | -0.37601319  | -2.14732787 |
| 6  | -2.39568309 | 0.56157273   | -2.35690435 |
| 6  | -2.09930077 | 1.90974334   | -2.15929446 |
| 6  | 0.70150077  | -1.17532808  | -1.56436469 |
| 7  | -0.13636103 | -2.25609270  | -1.68848666 |
| 6  | -1.38972206 | -1.83683405  | -2.06309825 |
| 6  | -3.66581081 | -4.74016290  | -2.46049441 |
| 6  | -3.32269504 | -6.06993056  | -2.12199440 |
| 6  | -4.21139547 | -7.12101551  | -2.34973186 |
| 6  | -5.45112810 | -6.81763234  | -2.91522200 |
| 6  | -5.79270564 | -5.49446386  | -3.25203033 |
| 6  | -4.90291714 | -4.44147927  | -3.03234873 |
| 6  | -2.51448507 | -3.90843067  | -2.10453960 |
| 7  | -1.54357491 | -4.71690218  | -1.56061700 |
| 6  | -1.96917066 | -6.02305280  | -1.56473970 |
| 6  | 3.03067864  | -8.80339498  | 0.23362810  |
| 6  | 2.67680172  | -10.15337582 | 0.27280304  |
| 6  | 1.36928099  | -10.57169060 | -0.03633437 |
| 6  | 0.38226110  | -9.65062964  | -0.39230970 |
| 6  | 0.73052822  | -8.30028085  | -0.42291833 |
| 6  | 2.04426113  | -7.88008950  | -0.11259550 |
| 6  | -0.02610007 | -7.09139096  | -0.75661085 |
| 7  | 0.80342717  | -6.00438180  | -0.61725563 |
| 6  | 2.06403712  | -6.42318026  | -0.26279612 |
| 7  | 3.16388354  | -5.68300793  | -0.11868563 |
| 7  | -1.29528560 | -7.10488745  | -1.16786027 |
| 7  | 1.99389685  | -1.16975839  | -1.23843950 |
| 7  | -2.46863964 | -2.58838716  | -2.28878285 |
| 12 | 0.23460374  | -4.05824586  | -0.79998458 |
| 8  | -0.53275855 | 3.62938518   | -1.41419150 |
| 1  | 7.18819418  | -0.84609493  | -0.38262330 |
| 1  | 7.78815160  | -3.17495407  | 0.20733124  |
| 1  | 6.03430442  | -4.97098334  | 0.27128965  |
| 1  | 4.81777608  | -0.23443930  | -0.93002008 |
| 1  | 1.24304832  | 1.70734245   | -1.35436250 |
| 1  | -3.40711263 | 0.24047678   | -2.61458796 |
| 1  | -2.88776022 | 2.66413080   | -2.24666137 |
| 1  | -3.93350684 | -8.14526430  | -2.09109645 |
| 1  | -6.17008544 | -7.61889804  | -3.10410874 |
| 1  | -6.77094066 | -5.29240360  | -3.69567269 |
| 1  | -5.15550261 | -3.41213103  | -3.29661553 |
| 1  | 4.04430054  | -8.46829731  | 0.46452600  |
| 1  | 3.42599263  | -10.90119135 | 0.54497638  |
| 1  | 1.12689035  | -11.63680670 | 0.00100494  |
| 1  | -0.63345492 | -9.96546630  | -0.64196684 |
| 1  | -1.21242853 | 4.21178558   | -1.81132263 |

**Table S5.** Cartesian matrix for the model based on dimer 4 (optimized structure).

| Atom No | x           | y           | z           |
|---------|-------------|-------------|-------------|
| 6       | 6.28343658  | 2.29070466  | 1.20019599  |
| 6       | 6.49471605  | 3.66367273  | 0.97326494  |
| 6       | 5.42166364  | 4.53978851  | 0.79918411  |
| 6       | 4.13256601  | 4.00827917  | 0.84383311  |
| 6       | 3.92138020  | 2.62989467  | 1.06879112  |
| 6       | 4.99401833  | 1.75797791  | 1.25741245  |
| 6       | 2.80639528  | 4.61891550  | 0.73266878  |
| 7       | 1.85300766  | 3.63410836  | 0.84102898  |
| 6       | 2.47175700  | 2.42800114  | 1.07872835  |
| 6       | -0.43455145 | -2.58680480 | 1.47665956  |
| 6       | 0.48103693  | -1.54052586 | 1.46986924  |
| 6       | -0.03665918 | -0.24987671 | 1.58041310  |
| 6       | -1.42211093 | -0.02438547 | 1.72906525  |
| 6       | -2.31684416 | -1.09373943 | 1.80574880  |
| 6       | -1.81140908 | -2.38544178 | 1.66814935  |
| 6       | 0.58701646  | 1.06582779  | 1.42831576  |
| 7       | -0.39850695 | 2.02225079  | 1.43604192  |
| 6       | -1.61414331 | 1.42559881  | 1.66698438  |
| 6       | -4.24404582 | 3.99578028  | 2.08664027  |
| 6       | -4.02383684 | 5.38357194  | 1.94118189  |
| 6       | -5.04407495 | 6.30327017  | 2.18425364  |
| 6       | -6.29074157 | 5.80717465  | 2.56987249  |
| 6       | -6.50996962 | 4.42468488  | 2.71671904  |
| 6       | -5.48822826 | 3.50293492  | 2.48108138  |
| 6       | -2.97462424 | 3.33906743  | 1.76929816  |
| 7       | -2.05256453 | 4.29793009  | 1.42379245  |
| 6       | -2.62649089 | 5.54229618  | 1.53407557  |
| 6       | 2.17225626  | 9.03455533  | 0.75959289  |
| 6       | 1.67734142  | 10.33065766 | 0.91737428  |
| 6       | 0.30684582  | 10.56361542 | 1.14189731  |
| 6       | -0.60217344 | 9.50641242  | 1.21520722  |
| 6       | -0.11144244 | 8.21138032  | 1.04426605  |
| 6       | 1.26305782  | 7.97757172  | 0.81707764  |
| 6       | -0.75798197 | 6.89777509  | 1.07273786  |
| 7       | 0.19159219  | 5.93200527  | 0.83150073  |
| 6       | 1.42666902  | 6.52564635  | 0.71861602  |
| 7       | 2.61745221  | 5.93417447  | 0.62672372  |
| 7       | -2.04837086 | 6.72921404  | 1.35528204  |
| 7       | 1.89961165  | 1.24479304  | 1.29607699  |
| 7       | -2.79689302 | 2.01865031  | 1.82829999  |
| 12      | -0.18056414 | 3.91760142  | 0.64502595  |
| 8       | 0.02092249  | -3.89577007 | 1.16172976  |
| 1       | 7.14495324  | 1.63279593  | 1.34042221  |
| 1       | 7.51734181  | 4.04810570  | 0.93982708  |
| 1       | 5.57365291  | 5.60898629  | 0.63543411  |
| 1       | 4.81949557  | 0.69591041  | 1.44236442  |
| 1       | 1.54867812  | -1.71420847 | 1.32516722  |
| 1       | -3.38803660 | -0.91415026 | 1.92058844  |
| 1       | -2.47717050 | -3.25052781 | 1.67715909  |
| 1       | -4.86158973 | 7.37395240  | 2.06975827  |
| 1       | -7.11272091 | 6.50121511  | 2.76257598  |
| 1       | -7.49820664 | 4.07070971  | 3.02119626  |
| 1       | -5.64630358 | 2.42832000  | 2.59638918  |
| 1       | 3.23501472  | 8.84099501  | 0.59737593  |
| 1       | 2.36283784  | 11.18089549 | 0.87260276  |
| 1       | -0.04658508 | 11.59044184 | 1.26589135  |
| 1       | -1.66554926 | 9.67407747  | 1.40027064  |
| 6       | 6.71145055  | -1.48097332 | -0.94925497 |
| 6       | 7.13780244  | -2.80101574 | -0.71198365 |
| 6       | 6.22259907  | -3.85330355 | -0.64333091 |

|    |             |              |             |
|----|-------------|--------------|-------------|
| 6  | 4.87025570  | -3.55313118  | -0.80804113 |
| 6  | 4.44266617  | -2.22757265  | -1.04598649 |
| 6  | 5.35937650  | -1.17903299  | -1.12439173 |
| 6  | 3.66514300  | -4.38492053  | -0.81307505 |
| 7  | 2.57140248  | -3.58064733  | -1.01878403 |
| 6  | 2.98659308  | -2.28056497  | -1.18707769 |
| 6  | -0.71053128 | 2.15552050   | -1.96659969 |
| 6  | 0.35068635  | 1.27648553   | -1.76177840 |
| 6  | 0.10007547  | -0.08364354  | -1.94072611 |
| 6  | -1.17721991 | -0.55427296  | -2.30976406 |
| 6  | -2.20487589 | 0.34397769   | -2.59775112 |
| 6  | -1.96308940 | 1.70652961   | -2.42861650 |
| 6  | 0.92928223  | -1.26708543  | -1.70427976 |
| 7  | 0.14089561  | -2.38454896  | -1.83065290 |
| 6  | -1.11964649 | -2.01480498  | -2.22984089 |
| 6  | -3.20349584 | -5.00958948  | -2.85094438 |
| 6  | -2.77398670 | -6.33554567  | -2.62033650 |
| 6  | -3.58171690 | -7.42160316  | -2.95829892 |
| 6  | -4.83129157 | -7.15560167  | -3.52127922 |
| 6  | -5.25928658 | -5.83457938  | -3.75054517 |
| 6  | -4.44819194 | -4.74641581  | -3.42311773 |
| 6  | -2.11580399 | -4.13711113  | -2.40425562 |
| 7  | -1.10044494 | -4.91667083  | -1.90147525 |
| 6  | -1.43485530 | -6.24231550  | -2.03584821 |
| 6  | 3.75199827  | -8.84999249  | -0.56800893 |
| 6  | 3.48079402  | -10.21747225 | -0.64334075 |
| 6  | 2.19188624  | -10.68698370 | -0.95808962 |
| 6  | 1.14187592  | -9.80062159  | -1.20522244 |
| 6  | 1.40697415  | -8.43386970  | -1.11594380 |
| 6  | 2.70104327  | -7.96258664  | -0.80019529 |
| 6  | 0.57235732  | -7.24857038  | -1.32334829 |
| 7  | 1.33265604  | -6.12692036  | -1.09436895 |
| 6  | 2.62726557  | -6.50018650  | -0.82341435 |
| 7  | 3.69186278  | -5.71183018  | -0.67023351 |
| 7  | -0.69503226 | -7.30978533  | -1.73256922 |
| 7  | 2.23304850  | -1.21065777  | -1.43957637 |
| 7  | -2.15269814 | -2.80904786  | -2.51037973 |
| 12 | 0.60872534  | -4.20813711  | -0.98893371 |
| 8  | -0.53626308 | 3.51723211   | -1.59888057 |
| 1  | 7.45358719  | -0.68013456  | -1.00070958 |
| 1  | 8.20425610  | -3.00281730  | -0.58330518 |
| 1  | 6.54334563  | -4.88271014  | -0.46843736 |
| 1  | 5.01991964  | -0.15816983  | -1.31234482 |
| 1  | 1.32754469  | 1.62166644   | -1.42071884 |
| 1  | -3.18686658 | -0.01685738  | -2.91125294 |
| 1  | -2.75467593 | 2.43140422   | -2.62075522 |
| 1  | -3.23587581 | -8.44304642  | -2.78440559 |
| 1  | -5.48972316 | -7.98456475  | -3.79315952 |
| 1  | -6.24259243 | -5.66195947  | -4.19541770 |
| 1  | -4.76689487 | -3.71741561  | -3.60390759 |
| 1  | 4.75143550  | -8.47485004  | -0.33653708 |
| 1  | 4.28149733  | -10.93863529 | -0.46050538 |
| 1  | 2.01528240  | -11.76416180 | -1.01427629 |
| 1  | 0.14091147  | -10.15391740 | -1.46324215 |
| 6  | -0.71330543 | 4.45487400   | -2.69726034 |
| 6  | 0.33262928  | 4.54357409   | -3.56039489 |
| 6  | 1.65010035  | 3.87283980   | -3.26743895 |
| 6  | 0.30921470  | 5.23961745   | -4.89092068 |
| 6  | -1.98683525 | 5.18898644   | -2.60743806 |
| 6  | -2.95124270 | 4.84635608   | -1.71989481 |
| 6  | -3.90995222 | 5.78210344   | -5.46558093 |
| 6  | -0.56640611 | 8.31171031   | -2.50414638 |
| 6  | 0.35541725  | 9.42066185   | -2.97195504 |
| 6  | -4.02503605 | 5.86945042   | -6.97588048 |

|    |             |             |             |
|----|-------------|-------------|-------------|
| 1  | 1.18563726  | 9.01536582  | -3.57019923 |
| 1  | -0.19417811 | 10.15492728 | -3.57982128 |
| 1  | -1.41137361 | 8.71388960  | -1.92166659 |
| 1  | -0.02341901 | 7.58205761  | -1.88142006 |
| 1  | 1.84270375  | 3.76889538  | -2.19118000 |
| 1  | 1.69692701  | 2.86724042  | -3.72223263 |
| 1  | 2.46208857  | 4.46719866  | -3.71543002 |
| 1  | -0.68828291 | 5.52762239  | -5.23393087 |
| 1  | 0.94905670  | 6.13754775  | -4.87293183 |
| 1  | 0.74930239  | 4.55061078  | -5.63407282 |
| 1  | -3.83144534 | 5.48297162  | -1.61630147 |
| 1  | -2.87256984 | 3.97193570  | -1.07329550 |
| 1  | -4.98106868 | 5.42535041  | -7.29578790 |
| 1  | -3.99783369 | 6.91805976  | -7.30757781 |
| 1  | -3.20607295 | 5.32168500  | -7.46613259 |
| 1  | -3.94531224 | 4.73195018  | -5.12514742 |
| 1  | -4.71848784 | 6.34066459  | -4.96572450 |
| 1  | 0.77607263  | 9.93079794  | -2.09115479 |
| 8  | -3.60919266 | 7.41445894  | -2.86287352 |
| 8  | -2.63074541 | 6.36310611  | -5.08025792 |
| 8  | -1.08307621 | 7.62239187  | -3.68578382 |
| 15 | -2.43592097 | 6.75052478  | -3.50327870 |
| 6  | 0.21134989  | -4.79687091 | 2.26933519  |
| 6  | -0.56870295 | -5.88815629 | 2.36440329  |
| 6  | -1.73775503 | -6.16560554 | 1.46275048  |
| 6  | -0.30169517 | -6.95373135 | 3.39229134  |
| 6  | 1.34491326  | -4.41036633 | 3.15547175  |
| 6  | 2.62884329  | -4.51438593 | 2.77373663  |
| 6  | 1.65171560  | -5.66842395 | 6.48489753  |
| 6  | -0.67151096 | -1.80080919 | 5.49506594  |
| 6  | -1.51318284 | -2.26289037 | 6.67271000  |
| 6  | 0.99947466  | -6.46140614 | 7.60292753  |
| 1  | -2.43196242 | -2.75986120 | 6.32693464  |
| 1  | -0.95137128 | -2.96383214 | 7.30784666  |
| 1  | 0.25901702  | -1.31232575 | 5.82789655  |
| 1  | -1.22661023 | -1.10192949 | 4.85167698  |
| 1  | -1.92252443 | -5.36388736 | 0.73741019  |
| 1  | -1.57572703 | -7.10238335 | 0.90253500  |
| 1  | -2.64669504 | -6.31201642 | 2.07285671  |
| 1  | 0.58015089  | -6.73876401 | 4.00532747  |
| 1  | -1.17119988 | -7.06921566 | 4.06164180  |
| 1  | -0.15261698 | -7.92189535 | 2.88243912  |
| 1  | 3.42560357  | -4.14715639 | 3.42723291  |
| 1  | 2.91314051  | -4.95032844 | 1.81064600  |
| 1  | 1.76544341  | -7.05283696 | 8.12949209  |
| 1  | 0.51881811  | -5.78880757 | 8.32930568  |
| 1  | 0.23951657  | -7.15109209 | 7.20537537  |
| 1  | 2.15346082  | -6.34442665 | 5.76754213  |
| 1  | 2.40173170  | -4.95985255 | 6.87263856  |
| 1  | -1.79698953 | -1.38860090 | 7.28135802  |
| 8  | 2.24937043  | -2.91449737 | 5.34531461  |
| 8  | 0.61100337  | -4.92345684 | 5.79256008  |
| 8  | -0.33018576 | -2.91815517 | 4.61696735  |
| 15 | 1.08058243  | -3.68184865 | 4.81936171  |

**Table S6.** Analytic gradient matrix for the model based on dimer **2** as a part of OUT file.

```

$Energy
E=-3.884019678279e+03
D=-9.15919660e-01 -4.10820279e-02 -1.16999778e-01
G= 6.02300124e-07  9.83907744e-07  1.63702713e-06
  2.42692840e-07 -1.05771259e-06 -2.28411846e-06
  7.61301408e-07 -2.89764902e-06 -9.58543902e-06
  3.21457826e-06  3.46727041e-06  5.68045444e-06
 -1.01022911e-06 -1.59072020e-06  8.77767877e-06
 -2.38242787e-06  3.50340550e-06  6.69634357e-06
 -5.92177270e-06 -3.40129612e-06 -2.79273059e-06
  4.82738957e-06 -1.54000520e-06 -1.00363449e-05
 -6.82392445e-07 -5.39853146e-06 -9.94178364e-08
 -4.26261228e-06  1.18857166e-05 -8.16789367e-06
  2.11670842e-06  9.86484995e-06  9.06098107e-06
  6.07976449e-06  4.26716202e-07 -1.47870626e-05
 -6.54743520e-06 -4.03789026e-06 -1.32935630e-05
  4.01740303e-06  5.12928201e-06  2.16965822e-05
  2.89169979e-06 -9.78393861e-06 -3.67895916e-06
 -3.77547567e-06 -2.50518736e-06  5.77368478e-06
  5.90362767e-06 -4.62066182e-06 -1.47217395e-05
 -3.09994794e-06  2.87151275e-06  1.12716094e-05
 -3.81025538e-07 -1.99350339e-09  1.07006458e-05
  3.24595570e-06  2.74032709e-06  2.85493866e-06
 -9.33029328e-07 -1.47185793e-06 -5.73889751e-06
 -2.35247818e-07 -2.15732405e-08 -2.29629037e-06
 -3.43789333e-07  3.33988663e-07  9.20283130e-07
  1.21051001e-06  1.44223339e-06  1.64343971e-06
 -4.30875070e-06 -1.09610858e-05 -1.21060240e-05
  4.25108304e-06  1.50805471e-05 -5.99826098e-06
 -5.49042950e-06 -7.35119543e-06  6.53591678e-06
 -7.22765667e-07 -9.94514790e-07 -6.77196453e-07
 -1.01659776e-06  1.09930868e-06  1.36006849e-08
  1.42216056e-06  5.53352376e-07 -8.95421715e-07
 -9.04208871e-08 -2.32228110e-06 -4.85291332e-06
  1.16647332e-06  2.75504924e-06  5.90724648e-06
  1.62036360e-06  4.30084681e-06  9.06715995e-06
 -4.21713321e-06 -3.98438809e-06 -1.00445431e-05
  6.14446146e-08  8.42465019e-06  1.97484745e-05
 -6.23702890e-06 -8.89283382e-06 -2.45029504e-05
  2.39188353e-06  3.04094145e-06  9.61292239e-06
  3.76045790e-06  4.25941872e-06 -7.05945420e-06
  2.15532337e-06  5.62950709e-06  4.76902716e-06
  3.38407320e-06  4.94840073e-06  2.80888556e-06
  5.88590843e-06 -7.20699602e-06  1.06285165e-05
 -8.32288106e-06 -6.37962836e-06 -3.25602976e-06
  1.54395349e-07 -6.46205011e-07 -3.63425535e-06
 -3.46786329e-07  8.44875498e-07  3.40396075e-06
 -4.38682757e-07  5.87766254e-07  1.52053363e-06
  7.66382464e-08 -8.91912144e-07 -2.29943793e-06
 -1.58056009e-06 -8.28119162e-06  4.86430943e-07
 -1.75110155e-07  6.24389483e-07 -8.37625943e-06
 -8.45552808e-07  1.40502315e-06  2.01350561e-06
  2.02699670e-07  3.69254820e-07  1.76104196e-06
  2.49876202e-07  2.87703243e-07  2.01716429e-06
 -3.55715312e-07 -2.83691462e-07 -2.65510626e-06
  3.64402273e-07 -8.17715338e-07 -1.40824074e-06
 -4.00331615e-08 -1.85438566e-07 -2.37748642e-07
 -5.19047059e-08 -6.09294412e-08 -1.35072359e-06
 -1.66499275e-07 -9.29126558e-08 -6.51991972e-07

```

|                 |                 |                 |
|-----------------|-----------------|-----------------|
| 1.67239643e-08  | 3.15732409e-07  | 1.64400768e-06  |
| 2.80795255e-06  | -2.04492468e-06 | 4.26195828e-06  |
| 9.87250696e-07  | -1.11430272e-06 | -1.35697660e-06 |
| -3.45708453e-07 | 9.63488433e-07  | 2.37042205e-06  |
| -1.93773442e-06 | 2.74903529e-06  | 9.07456628e-06  |
| 4.44464620e-06  | -3.46182334e-06 | -5.20587989e-06 |
| 1.00842407e-07  | 1.53099678e-06  | -7.21645505e-06 |
| 3.64629111e-07  | -2.29471998e-06 | -7.30108746e-06 |
| -6.22388918e-06 | 3.34500312e-06  | -1.72242102e-06 |
| 2.05516365e-06  | 3.11333721e-06  | 1.18000981e-05  |
| -6.42683233e-07 | 5.61724345e-06  | 2.34163236e-06  |
| -3.67246735e-06 | -1.14684554e-05 | 7.65841947e-06  |
| 3.59696568e-06  | -7.58128790e-06 | -7.68545112e-06 |
| 3.73861313e-06  | -7.49343629e-07 | 1.40467475e-05  |
| -1.15850252e-05 | 1.17912455e-06  | 6.44753789e-06  |
| 1.01704909e-05  | -3.81648312e-06 | -1.88474867e-05 |
| 9.42951582e-07  | 9.27388105e-06  | 3.66767245e-06  |
| -1.34283727e-06 | 6.11811940e-06  | 3.93221935e-07  |
| -4.17895218e-06 | 3.17717310e-06  | 9.04864954e-06  |
| 8.84404354e-06  | -1.50557313e-06 | -7.01605947e-06 |
| 2.20107033e-06  | -1.41790348e-06 | -8.79630807e-06 |
| 3.28744388e-06  | -1.67159555e-06 | -5.01915589e-06 |
| -2.54450340e-06 | 7.88425566e-07  | 4.99415104e-06  |
| -5.56982420e-07 | 2.39058986e-08  | 1.68514931e-06  |
| -6.76733470e-09 | -5.43281298e-07 | -9.80103343e-07 |
| 6.50697677e-07  | -4.86501294e-07 | -1.84985763e-08 |
| -4.18833802e-06 | 1.30487182e-05  | 7.14508776e-06  |
| 3.85796154e-06  | -1.61988998e-05 | 5.18508438e-06  |
| -4.10061888e-06 | 7.28593075e-06  | -2.56823217e-06 |
| -1.08100439e-06 | 9.94319425e-07  | 9.88843298e-07  |
| -8.03642591e-07 | -1.29074059e-06 | -4.13426437e-07 |
| 1.43455997e-06  | -3.88815831e-07 | 1.38845132e-06  |
| -1.28823885e-06 | 2.35061537e-06  | 3.95764448e-06  |
| 2.32727941e-06  | -2.01812069e-06 | -5.42416182e-06 |
| 4.42773946e-06  | -4.34332762e-06 | -9.05239048e-06 |
| -7.65872700e-06 | 3.25170343e-06  | 1.23155553e-05  |
| 6.61625675e-06  | -5.67514768e-06 | -1.88482926e-05 |
| -1.07346581e-05 | 7.40747109e-06  | 1.90898355e-05  |
| 3.43396675e-06  | -3.25109217e-06 | -3.88105460e-06 |
| 3.14569859e-06  | -3.48858121e-06 | 2.90228955e-06  |
| 3.22455458e-06  | -7.01131213e-06 | -9.29562388e-06 |
| -2.33687345e-06 | -6.40569240e-06 | 6.04798103e-07  |
| 6.57435382e-06  | 4.35010386e-06  | -7.34455165e-06 |
| -1.16122364e-05 | 3.70516024e-06  | 1.89461491e-06  |
| -7.30368699e-07 | 6.13299678e-07  | 3.20551660e-06  |
| 5.20124334e-07  | -7.73346688e-07 | -2.92294371e-06 |
| 2.48168002e-07  | -5.72872600e-07 | -1.70291775e-06 |
| -5.09824730e-07 | 5.30408365e-07  | 2.27628485e-06  |
| -2.15473228e-06 | 6.48611865e-06  | -4.77942718e-07 |
| -2.48137794e-06 | -4.87867957e-07 | 8.62064189e-06  |
| -3.67929950e-07 | -1.53416970e-06 | -2.03058192e-06 |
| 7.65967330e-07  | -1.23390495e-07 | -1.03516902e-06 |
| 6.12757800e-07  | -1.94156482e-07 | -1.46405107e-06 |
| -9.45165661e-07 | 2.97573348e-07  | 2.40525085e-06  |
| 1.40339658e-07  | 1.46646148e-07  | 7.63007306e-07  |
| -9.20019636e-08 | 3.03567071e-07  | 1.59802165e-07  |
| -3.74770803e-07 | 7.26271188e-08  | 1.36879498e-06  |
| -3.43995690e-07 | 9.64810273e-08  | 5.34588075e-07  |
| 5.42612641e-07  | -4.84478431e-07 | -1.47419875e-06 |
| 4.48135295e-06  | 4.08369033e-06  | -4.65794519e-06 |

\$end

G(max) = 0.00002450

**Table S7.** Analytic gradient matrix for the model based on dimer 4 as a part of OUT file.

```
$Energy
E=-5.801606423596e+03
D=-4.08015383e-01 -9.28632875e-01 8.13645870e-02
G= 2.05226868e-07 -5.33233854e-07 4.70358227e-08
 1.11994088e-07 -4.76671992e-07 -2.71182760e-07
 2.09806963e-07 -1.73256252e-07 -1.16348788e-08
 5.57328121e-07 -4.53263119e-07 -1.46856365e-06
 1.57977827e-06 -9.56725268e-07 -3.12308626e-06
-1.03744856e-08 5.21425097e-07 1.58107656e-06
-5.07917054e-07 9.60786556e-07 7.17445705e-08
 1.89624043e-06 4.05945264e-07 -4.88982416e-06
-3.80552542e-06 2.55139916e-06 6.52652339e-06
 1.34870771e-07 -5.08215588e-07 -6.12773058e-06
-4.06300526e-06 2.59486648e-06 -1.08322039e-05
 8.51263493e-07 -1.09404862e-07 1.07779789e-05
 9.01540065e-07 -1.55956054e-06 1.81743111e-07
-2.57797598e-06 1.23495398e-06 -5.00420187e-06
 2.21012753e-06 6.16710153e-07 4.32857336e-06
-1.79135512e-06 3.60833172e-07 -1.18495730e-05
-3.04888809e-06 -4.35726998e-06 -5.61518106e-06
 1.58902782e-06 3.43476736e-06 3.42994871e-06
-4.94675388e-07 2.29259972e-07 7.75545654e-07
-1.68016488e-07 -1.89290975e-07 2.31945142e-07
 1.51778876e-06 2.08191864e-07 -1.16886669e-07
 1.70888944e-07 7.36188237e-07 -6.84918035e-08
 1.30589161e-07 4.78233286e-08 3.56077371e-07
 1.66813516e-06 -1.61743253e-07 9.42230248e-07
 2.02948959e-07 2.07366984e-06 -2.78835394e-06
-5.67750818e-07 -3.55702105e-06 6.30419290e-07
-4.54938326e-07 2.71030747e-06 -2.16906353e-06
 2.06514279e-06 1.51957572e-06 -2.46406277e-06
-1.15375354e-06 -2.10084759e-06 3.29853879e-06
 1.13891783e-06 2.21075786e-06 -9.72159693e-07
-1.02834026e-07 -1.32387697e-06 -2.70592949e-06
 6.70675501e-07 -7.43563954e-07 2.22797979e-06
 7.30923194e-07 -4.56580822e-07 -2.65541397e-07
-1.59585250e-06 4.34557376e-06 2.50834630e-06
 2.81779691e-07 -1.17513004e-06 -7.14073757e-07
-3.99214143e-06 -5.74045462e-07 2.30866460e-07
 2.60087026e-06 -1.62151948e-06 2.97092351e-06
 1.43986295e-06 -1.87058123e-06 8.34611192e-07
 2.84192269e-06 -1.64753907e-06 1.26591477e-06
 5.93288775e-07 -1.06677204e-06 4.71923096e-06
 4.24848671e-06 4.14558652e-06 2.65230018e-06
 1.11732276e-05 6.83823660e-06 1.13523022e-06
 2.22090200e-07 -2.14479608e-07 -8.96161039e-07
 1.88277941e-07 -1.69029466e-07 6.99941978e-09
 2.80302591e-07 -1.92364155e-07 -1.55403100e-07
-2.68434446e-07 -7.04549742e-08 4.89290379e-07
 9.70562130e-07 -1.56863459e-06 6.31957256e-06
 3.20367768e-07 -1.05657464e-06 1.81877344e-06
-1.47431948e-06 5.14121502e-07 -1.26034687e-06
 1.90352511e-08 3.60617622e-07 5.73911798e-07
 1.42306362e-07 -1.75181814e-07 3.81752418e-07
 4.95504685e-08 5.80831568e-07 3.18749765e-08
-1.65346977e-07 1.84581342e-07 2.83426358e-07
-6.98582067e-10 -3.46571075e-07 -5.28215689e-07
 4.42403888e-07 1.88780742e-07 -5.17530793e-07
 5.80760918e-07 -3.32818158e-07 -3.91212209e-07
 3.54320206e-07 -5.63110251e-09 1.24243534e-06
-4.56295906e-07 -4.99896974e-08 6.87850418e-07
 2.59662835e-08 1.58300410e-08 -1.43521841e-06
```

|                 |                 |                 |
|-----------------|-----------------|-----------------|
| -5.44701472e-07 | -1.28376269e-06 | -1.23899599e-07 |
| 1.16237454e-07  | 9.85845145e-07  | -2.97768399e-08 |
| 2.27487910e-07  | -7.16732183e-07 | 1.79093345e-06  |
| 4.43305739e-07  | -3.96191715e-07 | -3.22943400e-06 |
| 2.53259114e-06  | 1.76241481e-07  | 1.08666205e-06  |
| 2.67224591e-06  | -3.78749388e-06 | -1.93421550e-06 |
| -3.24143940e-06 | 3.21849325e-06  | 7.69590924e-06  |
| 4.07235433e-07  | -4.60747072e-06 | -3.09541679e-06 |
| -5.57437616e-07 | 4.35932959e-06  | 5.42601793e-06  |
| -2.30991517e-06 | -3.40409891e-08 | -3.79343278e-06 |
| 4.69205823e-06  | -1.78100391e-06 | -8.54021539e-06 |
| -1.87409146e-06 | -1.16787342e-07 | 3.58876104e-06  |
| 6.31301734e-07  | 7.31925772e-07  | -1.37785571e-06 |
| -4.48471187e-07 | 5.72860158e-07  | 3.00683105e-06  |
| -2.02128925e-06 | 1.19181651e-06  | 1.12603609e-05  |
| -2.33765264e-06 | -5.66528345e-07 | -5.20427991e-06 |
| 7.35203988e-07  | 1.56490250e-06  | 2.04569581e-06  |
| -3.77975462e-06 | 9.63181670e-07  | 3.46109155e-06  |
| 1.72776310e-06  | -6.06653070e-07 | -6.04783860e-07 |
| -9.21285474e-07 | -2.42322673e-07 | 9.39893350e-07  |
| 5.23588070e-07  | 1.22037549e-06  | -1.26742991e-07 |
| -2.13126680e-06 | -4.25214924e-07 | 3.02631581e-07  |
| 5.96540877e-06  | -3.94462834e-06 | -1.60795730e-05 |
| -1.59106659e-07 | 7.87222402e-07  | 4.48482986e-07  |
| -9.55368516e-07 | -2.67015777e-06 | 1.36404560e-06  |
| 6.41755819e-08  | 6.94686621e-07  | 2.51924718e-06  |
| -2.22873548e-07 | -5.22189706e-07 | -1.49956442e-06 |
| -3.89980859e-07 | 2.36010559e-07  | 5.02007966e-08  |
| -1.42050934e-08 | -7.70832279e-07 | -1.94373840e-07 |
| 1.34982600e-07  | 5.11712242e-08  | 1.55772528e-06  |
| -2.46902173e-06 | -2.62876178e-06 | 8.90057830e-07  |
| -5.73413450e-06 | 7.26517907e-07  | 9.05987221e-06  |
| -1.41399474e-06 | -4.47792401e-07 | 9.80812696e-06  |
| 9.37890265e-06  | 1.07235085e-06  | -2.03010536e-05 |
| -9.59488373e-06 | 8.05084106e-07  | 7.66587043e-06  |
| 4.71337808e-06  | 1.86472675e-06  | -1.01739991e-05 |
| 3.13728716e-06  | -2.28452608e-06 | -9.59751898e-06 |
| -4.54729937e-06 | 3.58187607e-06  | 1.60328447e-05  |
| -6.57897524e-06 | -2.20839184e-07 | -6.56044560e-06 |
| -2.17695360e-06 | 2.53770352e-06  | -1.00003401e-06 |
| 2.33648453e-07  | -5.16927171e-07 | -1.54357994e-07 |
| -1.83348951e-07 | -7.84298156e-08 | -1.44440963e-07 |
| -2.05664802e-07 | -1.73522061e-07 | 3.69828709e-07  |
| -3.49512554e-07 | -4.20546232e-07 | -1.05141503e-06 |
| -6.50680242e-07 | -2.40566747e-06 | 2.09673182e-06  |
| -4.80718203e-07 | 6.68853208e-07  | 9.24573864e-07  |
| -2.21947158e-07 | -2.60934541e-07 | 1.09350524e-06  |
| -5.13080997e-07 | 1.00062899e-07  | -2.25725663e-07 |
| -3.92642368e-07 | 5.38235795e-07  | -3.43574581e-07 |
| -5.08318668e-07 | -1.66477771e-07 | 5.42555916e-07  |
| -1.14946609e-07 | 2.39347196e-07  | 9.07648235e-08  |
| -2.33401496e-07 | 1.69903107e-07  | -1.23605290e-06 |
| -8.93841282e-07 | -2.30705737e-07 | 6.05331220e-07  |
| -3.70707180e-07 | 2.35576445e-08  | -1.78837102e-07 |
| -3.89701817e-07 | 1.11154157e-07  | -6.21115666e-07 |
| 6.47893183e-06  | -4.26357808e-06 | 1.04700569e-06  |
| -3.36531076e-07 | -4.59053815e-06 | -2.82722827e-06 |
| -9.40342522e-07 | 3.08777787e-06  | 4.05314669e-06  |
| -3.88591595e-06 | 1.95984404e-06  | 5.90890055e-07  |
| -7.33763127e-06 | 5.01814328e-07  | -2.53701215e-06 |
| 5.92168954e-06  | 5.44824416e-06  | 8.39907817e-06  |
| 2.45105472e-06  | 6.06434734e-06  | -5.28419812e-06 |
| -4.00862342e-06 | 3.69386553e-06  | -1.59836302e-06 |
| -6.36043595e-07 | 2.87195147e-07  | 1.54435901e-06  |

```

-2.03167400e-06  2.49376340e-06  1.38938314e-06
 1.89481453e-07 -7.08590908e-08 -2.99446996e-07
 7.55523685e-07  1.01074869e-07 -5.49541274e-07
 8.86666008e-07 -4.91767362e-07  9.69098941e-07
 6.43005084e-07  5.04137630e-07  3.84145665e-07
-1.74523207e-07 -7.42708805e-07 -5.23649378e-07
 1.30424786e-06  4.88206645e-07 -1.65390421e-06
 3.64951093e-07 -5.06471899e-07 -7.46738604e-07
 1.40698147e-07  3.76144528e-07  1.93413638e-07
 1.83829454e-06 -1.15118995e-06 -2.91432970e-07
 1.05969080e-06  1.10103097e-07  3.33091626e-07
-2.00750350e-06 -2.38710251e-06 -3.28362170e-06
-1.31697386e-06 -1.43129987e-06 -1.73613633e-06
 6.06964276e-07 -1.42225199e-06  4.25699885e-07
-3.31868441e-08  9.12141304e-08 -3.31200039e-07
 3.34670928e-07  2.26738210e-07  2.62693420e-07
-1.33428454e-06 -3.82956782e-07  1.66338869e-07
-1.62289577e-07 -1.78755470e-06  2.76070642e-06
 9.99717599e-07 -6.90373286e-07 -1.83928966e-07
-1.05066222e-06 -6.07754248e-06  5.13078863e-06
 7.54955366e-08 -9.43709912e-06  4.00107343e-06
 4.92728866e-06 -5.60096805e-06 -4.44177088e-07
 3.29141711e-06  1.51085302e-05 -6.30690837e-06
-2.20075479e-06 -6.34653390e-06  1.03330915e-05
 1.15771584e-05 -7.11592964e-06 -9.96669748e-06
-1.32428085e-05  3.76435581e-07  2.80637951e-06
-7.45422775e-06  3.54255103e-06  1.10572075e-06
-4.93784215e-06 -4.08240422e-06 -2.06143997e-06
 2.48778592e-06 -3.76420991e-06  5.07545449e-06
-8.96242444e-07  8.85472472e-06 -2.01388419e-06
 2.27228260e-07 -1.03891190e-05  7.33061793e-06
 6.76707916e-07  5.98678403e-07  3.84783428e-07
-3.64037094e-07 -5.41080082e-06  4.12149361e-06
 2.72996743e-08  1.28973792e-07 -2.86536127e-07
-4.62512202e-07 -3.81165977e-08  4.53770062e-07
-3.52024402e-07  2.45578160e-06 -1.86631181e-06
-9.98231283e-07 -2.47521147e-07  4.51252856e-07
 4.67408692e-06 -2.84735574e-07 -8.11876969e-07
 1.87721093e-06  6.95224308e-07 -1.49377408e-06
 1.63377970e-06  4.55088339e-07  1.35397854e-06
 1.97924660e-06 -1.20565271e-06 -1.71821936e-06
 1.56877617e-06  1.50746432e-06  2.37409708e-06
-8.97949169e-07 -4.22884864e-07  3.08679080e-07
-2.44137524e-07  3.36323652e-06 -2.21347909e-06
-1.11759788e-06  1.50917233e-06 -2.32836763e-06
 7.98720501e-07  1.71435730e-06 -9.42111826e-07
-6.26690218e-07  9.90843141e-07 -1.20446266e-06
 2.76139451e-08  7.68026484e-07 -1.78651676e-06
-3.13578983e-06 -3.47113345e-06  6.24741617e-07
 1.01934504e-06 -1.77732227e-06  6.35927202e-07
-7.64774455e-07  2.93133150e-07 -6.13984250e-07
 5.44407000e-06 -4.03418031e-06 -9.65606892e-06
 3.33196661e-07 -3.81427965e-06 -8.70078896e-06
 4.86480453e-06  6.44063125e-06 -8.34255320e-06
-5.55769914e-06  1.25216864e-05  2.03724031e-05
$end
G(max) = 0.00002037

```
